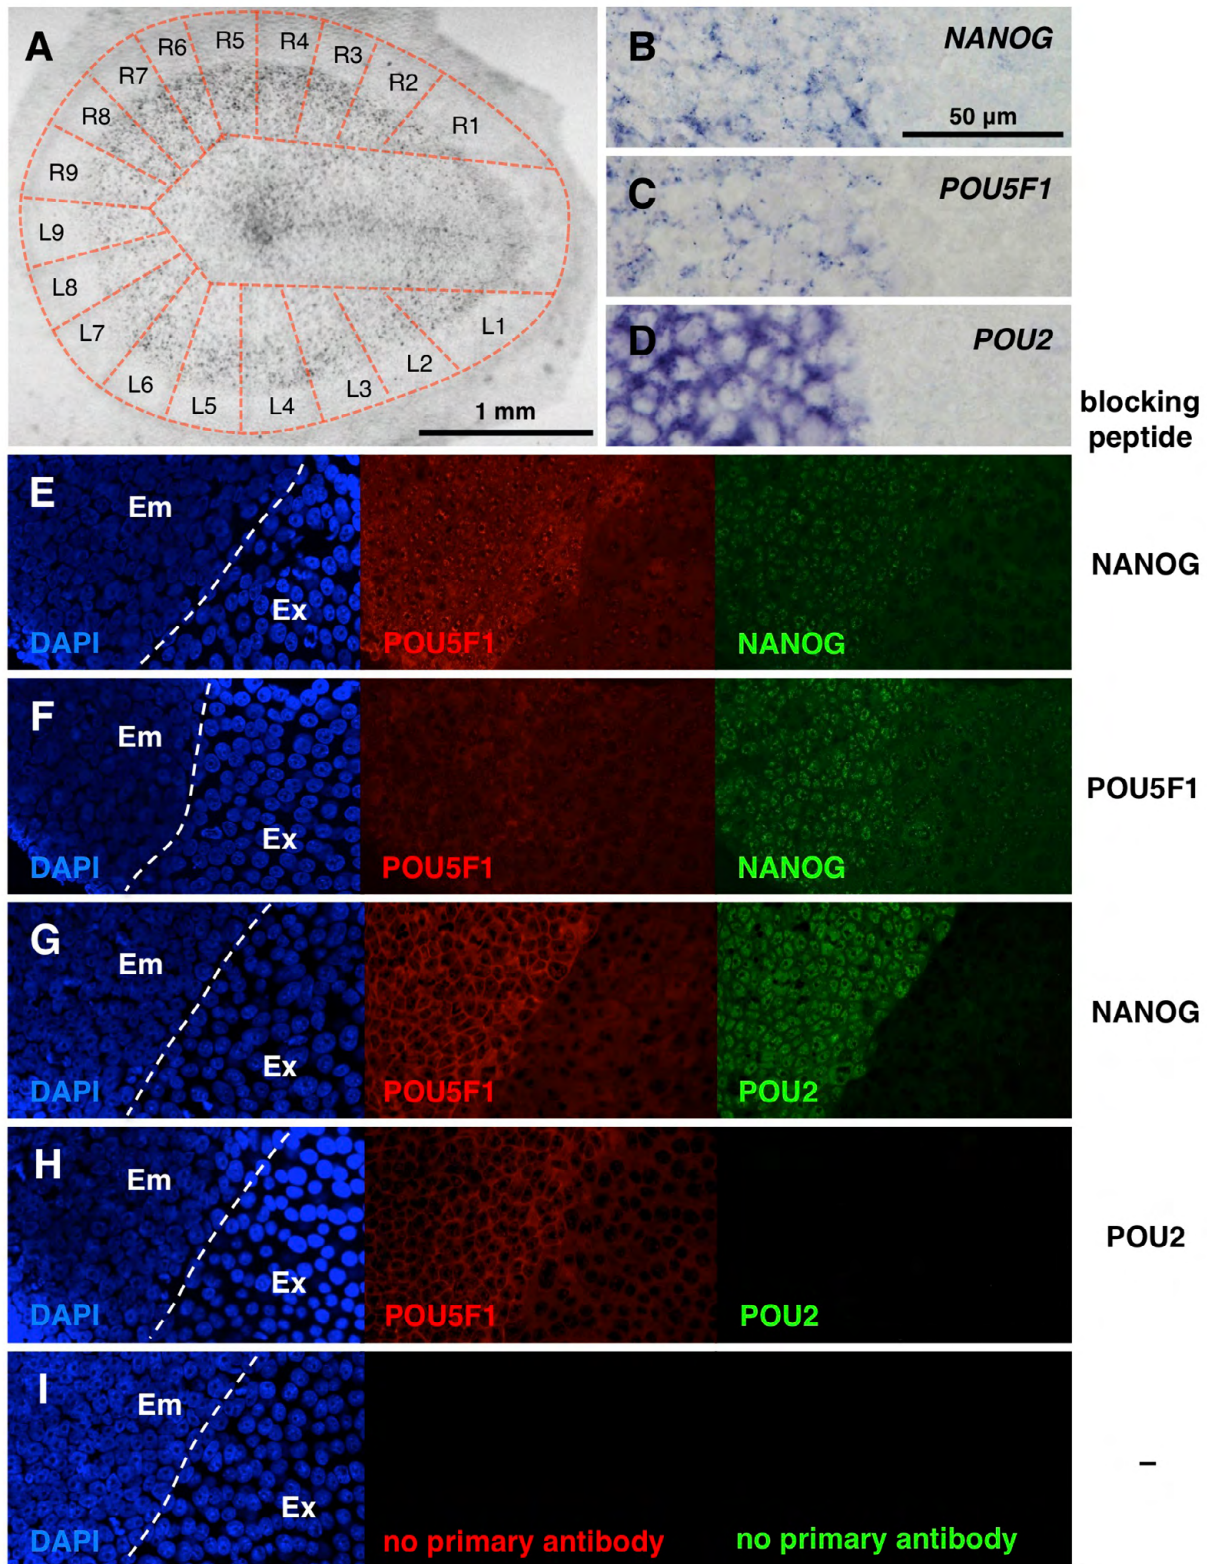

**Fig. S1. Antibody controls and *in situ* hybridisation.** (A) Scheme for dissecting fragments of a d14 RPY early gastrula for validation of antibodies. Each fragment contains a part of the extra-embryonic region and a part of the embryonic disc. (B-D) *In situ* hybridisation confirming expression of *NANOG*, *POU5F1* and *POU2*. In each image the embryonic disc is on the left and the extra-embryonic region is on the right. Conceptus fragments used from A were L7 (B), R6 (C) and L6 (D). All images are to the same scale. (E-I) Blocking controls for immunolocalisation of *NANOG*, *POU2* and *POU5F1* using the synthetic peptides to which the antibodies were raised. The peptide used for each experiment is shown on the right-hand side. In each case, the level of staining is reduced or abolished specifically by the peptide to which the antibody was raised. Conceptus fragments used from A were L4 (E), R4 (F), L5 (G) and R5 (H).
